1 **Genomic profiling of 553 uncharacterized neurodevelopment patients reveals a**  
2 **high proportion of recessive pathogenic variant carriers in an outbred population**

3

4 Youngha Lee<sup>1</sup>†, Soojin Park<sup>2</sup>†, Jin Sook Lee<sup>2,3,4</sup>†, Soo Yeon Kim<sup>2</sup>†, Jaeso Cho<sup>1</sup>,  
5 Yongjin Yoo<sup>1</sup>, Sangmoon Lee<sup>1</sup>, Taekyeong Yoo<sup>1</sup>, Moses Lee<sup>1</sup>, Jieun Seo<sup>1</sup>, Jeongeun  
6 Lee<sup>1,5</sup>, Jana Kneissl<sup>1</sup>, Jean Lee<sup>1</sup>, Hyoungseok Jeon<sup>1</sup>, Eun Young Jeon<sup>1</sup>, Sung Eun  
7 Hong<sup>1</sup>, Eunha Kim<sup>1</sup>, Hyuna Kim<sup>2</sup>, Woo Joong Kim<sup>2</sup>, Jon Soo Kim<sup>6</sup>, Jung Min Ko<sup>2</sup>, Anna  
8 Cho<sup>7</sup>, Byeong Chan Lim<sup>2</sup>, Won Seop Kim<sup>6</sup>, Murim Choi<sup>1,2\*</sup>, Jong-Hee Chae<sup>2\*</sup>

9

10 <sup>1</sup>Department of Biomedical Sciences, Seoul National University College of Medicine,  
11 Seoul, Republic of Korea. <sup>2</sup>Department of Pediatrics, Seoul National University College  
12 of Medicine, Seoul, Republic of Korea. <sup>3</sup>Department of Pediatrics, Gil Medical Center,  
13 Gachon University College of Medicine, Incheon, Republic of Korea. <sup>4</sup>Department of  
14 Genome Medicine and Science, Gil Medical Center, Gachon University College of  
15 Medicine, Incheon, Republic of Korea. <sup>5</sup>Interdisciplinary Program for Bioengineering,  
16 Graduate School, Seoul National University, Seoul, Republic of Korea. <sup>6</sup>Department of  
17 Pediatrics, College of Medicine, Chungbuk National University, Cheongju, Republic of  
18 Korea. <sup>7</sup>Department of Pediatrics, Ewha Womans University School of Medicine, Seoul,  
19 Republic of Korea.

20

21 \* Correspondence: murimchoi@snu.ac.kr and chaeped1@snu.ac.kr

22 †Youngha Lee, Soojin Park, Jin Sook Lee, Soo Yeon Kim contributed equally to this  
23 work.

24

25

26

27 **Abstract**

28

29 **Background:** A substantial portion of Mendelian disease patients suffers from genetic  
30 variants that are inherited in a recessive manner. A precise understanding of  
31 pathogenic recessive variants in a population would assist in pre-screening births of  
32 such patients. However, a systematic understanding of the contribution of recessive  
33 variants to Mendelian diseases is still lacking.

34 **Methods:** Genetic diagnosis and variant discovery of 553 undiagnosed Korean  
35 patients with complex neurodevelopmental problems (KND for Korean  
36 NeuroDevelopmental cohort) were performed using whole exome sequencing of  
37 patients and their parents. Pathogenic variants were selected and evaluated based on  
38 a comparison to patient symptoms and genetic properties of the variants were  
39 analyzed.

40 **Results:** Disease-causing variants, including newly discovered variants, were  
41 identified in in 57.5% of the probands of the KND cohort. Of the 553 patients, 47.4%  
42 harbored variants that were previously reported as being pathogenic, and 35.1% of the  
43 previous reported pathogenic variants were inherited in a recessive manner. Genes  
44 that cause recessive disorders tend to be less constrained by loss-of-function variants  
45 and enriched in metabolic and mitochondrial pathways. This observation was applied to  
46 an estimation that approximately 1 in 17 healthy Korean individuals carry at least one  
47 of these pathogenic variants that develop severe neurodevelopmental problems in a  
48 recessive manner. Furthermore, the feasibility of these genes for carrier screening was  
49 evaluated.

50 **Conclusions:** We suggest that the odds are high for healthy individuals carrying a  
51 potentially pathogenic variant, and its genetic properties. Our results will serve as a  
52 foundation for recessive variant screening to reduce occurrences of rare Mendelian

53 disease patients. Additionally, our results highlight the utility and necessity of whole  
54 exome sequencing-based diagnostics for improving patient care in a country with a  
55 centralized medical system.

56

57 **Keywords:** Whole exome sequencing, Recessive variants, Clinical Neurology,

58 Developmental disorders, Pediatric disease

59

60 **Background**

61

62 A large fraction of Mendelian disorders follow a recessive inheritance pattern [1, 2]. The  
63 Online Mendelian Inheritance in Men (OMIM) lists 5,317 disorders and 3,077 of these  
64 are categorized as recessive (as of April 2019). For more common complex disorders,  
65 the contribution of recessive variants to the disease pathogenesis is less than expected  
66 [3–6]. For ultra-rare diseases, the contribution of recessive variants in inbred  
67 populations, such as Middle-Eastern countries, has been well proven [7–9]. However,  
68 the precise contribution of recessive variants to ultra-rare Mendelian disorders in an  
69 outbred population is still not well understood.

70         The inherent complexity of brain developmental processes inevitably leads to  
71 patients with diverse neurological problems that frequently challenge conventional  
72 diagnostic criteria. Therefore, diagnosis of neurological disorders that affect children is  
73 frequently hampered by rare and overlapping clinical features, which makes it difficult  
74 for clinicians to readily recognize and properly treat the disease entity. This makes  
75 pediatric neurologic patients an impending target for genome-wide genetic studies [10–  
76 12]. To facilitate diagnosis and discovery of novel disease pathophysiology, large-scale  
77 systematic efforts have been conducted at regional or national scales [13–16]. As many  
78 rare neurologic disorders in children follow Mendelian inheritance, disease-causing  
79 variant discovery by trio-based whole-exome sequencing (WES) has proved to be the  
80 most robust methodology, yielding instant diagnosis rates of 25-41% [10–12, 14, 16].

81         Notably, the medical system in Korea provides a unique opportunity to conduct  
82 a systematic survey of rare disorders and study the contribution of recessive variants at  
83 a large scale. With a nation-wide referral system focused on a handful of major tertiary  
84 clinical institutions, Seoul National University Children’s Hospital (SNUCH) covers a  
85 large portion of the 51-million population, allowing for consistent evaluation and

86 treatment of the patient cohort. For example, we recently reported on genetic analyses  
87 of large patient cohorts of Duchenne muscular dystrophy ( $n = 507$ ) and Rett-like  
88 syndrome lacking *MECP2* mutations ( $n = 34$ ) [17, 18]. Genetically, ethnic Koreans are  
89 a good example of an outbred population in which marriages between relatives and  
90 even between individuals possessing the same surnames were prohibited since the  
91 17<sup>th</sup> century, although the same surname marriage ban was lifted in 2005 [19]. Our  
92 study represents the largest of its kind that was conducted at a single clinic, and  
93 emphasizes the careful integration of clinical and genetic analyses.

94         We used WES to analyze a cohort of 553 patients (KND cohort) with severe  
95 neurodevelopmental disorders. We characterized the genotype-phenotype  
96 relationships of patients whose molecular defects had been identified, and explored the  
97 potential association of genes that had not been previously associated with disease.  
98 We demonstrate that a high proportion of recessively-inherited variants are associated  
99 with patients that have rare neurodevelopmental diseases. Variants that were inherited  
100 in a recessive manner were analyzed and their genetic properties were evaluated.  
101 Overall, we describe the establishment of a system that efficiently integrates advanced  
102 genetic techniques with clinical diagnostic processes to maximize benefits for pediatric  
103 patients and their families.

104

## 105 **Materials and Methods**

106

### 107 *Subjects*

108 Blood samples were obtained from enrolled patients and their parents, who provided  
109 informed consent. WES was performed on 553 patients who visited the SNUCH  
110 pediatric neurology clinic from July 2014 to January 2019 and displayed various  
111 neurodevelopmental problems of unknown origins, such as demyelinating or  
112 hypomyelinating leukodystrophy, hereditary spastic paraplegia, mitochondrial disorders,  
113 epileptic encephalopathy, Rett syndrome-like encephalopathy, ataxia, neuropathy,  
114 myopathies, and multiple congenital anomalies/dysmorphic syndromes with  
115 developmental problems (Table 1). The patients can be categorized into two groups: (i)  
116 clinically diagnosable but with substantial genetic heterogeneity (270/553, 48.8%) or (ii)  
117 heterogeneous and nonspecific clinical presentations without definite diagnosis  
118 (283/553, 51.2%; Additional file: Figure S1). Prior to the WES analysis, thorough  
119 clinical and laboratory evaluations and extensive patient examinations have been  
120 conducted to identify possible genetic causes. These included genetic tests with  
121 candidate gene sequencing, targeted gene sequencing panel, trinucleotide repeat  
122 analysis, microarray, metabolic work-up, brain/spine MRI, or muscle biopsy if  
123 applicable. All subjects were evaluated by three pediatric neurologists, two pediatric  
124 neuroradiologists, and a pathologist.

125

### 126 *Whole Exome Sequencing*

127 WES was performed at Theragen Etex Bio Institute (Suwon, Korea) following the  
128 standard protocol and the data were analyzed as described previously [18]. Depending  
129 on the genetic analysis result, each patient was categorized as one of the following:  
130 category 1: known disease-causing genes were found; category 2: causative gene for

131 other diseases were found; category 3: potentially pathogenic gene, but without prior  
132 disease association, was found; category 4: no disease-causing candidates were found;  
133 and category 5: known pathogenic copy number variation (CNV) was found.

134 Our variant assessment procedures were as follows: firstly, patient-specific  
135 CNVs were checked and samples with CNVs were classified as category 5. Then,  
136 patient-specific nucleotide variants such as *de novo*, compound heterozygous (CH),  
137 and rare homozygous (RHo) and hemizygous (RHe) variants were selected by  
138 comparing against parents and prioritized based on the inheritance pattern (Fig. 1a). In  
139 correlating the patient's clinical features with genetic variants, if patients carried a  
140 known pathogenic variant in OMIM or ClinVar, they were categorized as category 1 or 2,  
141 depending on similarity with reported and observed clinical manifestation. For  
142 previously unreported variants, if they were never seen in normal individuals (gnomAD  
143 [20], Korean Variant Archive (KOVA) [21] and in-house variants), harbored LoF, or were  
144 evolutionarily well-conserved at the amino acid level, they were categorized as  
145 potentially pathogenic. For CNV calling, the normalized coverage depths of each  
146 captured intervals were compared to the depths from related individuals.

147

#### 148 *Human Brain Transcriptome Data*

149 The BrainSpan transcriptome database (<http://www.brainspan.org>) was used to build  
150 developing human brain networks [22]. Data from eight post-conceptual weeks to 40  
151 years of age were analyzed. A total of 385 samples were used for the analysis after  
152 combining the replicates by taking mean values. Probes with TPM (transcripts per  
153 million) > 5 in at least one sample were used, yielding 23,943 probes as "brain-  
154 expressed transcripts".

155

#### 156 *Brain Transcriptome Network Analysis*

157 Using the above brain-expressed transcripts, we created eight known gene co-  
158 expression networks by selecting genes that are highly correlated to our set of genes  
159 ( $n = 164$ ; Pearson's correlation  $r > 0.7$ ), in which their disease associations were  
160 previously reported, from each developmental period (Fig. 1f). Then, we asked whether  
161 our novel genes can be successfully integrated into the known gene co-expression  
162 network. We randomly selected 53 genes (equal to the number of our novel genes) in  
163 brain-expressed transcripts and counted how many edges they formed with the known  
164 genes. The  $10^5$  random gene selections were performed and the number of edges with  
165 a known gene was used to construct a distribution. The number of edges from our  
166 observed novel genes was evaluated against the random distributions.  $P$ -values were  
167 calculated using z-score, assuming normal distributions.

168

#### 169 *Recessive variant analysis*

170 Variants were first filtered by gnomAD allele frequency of 0.001 in a heterozygous  
171 status and ability to alter protein sequences. Then CH variants were called on a trio  
172 setting. If a gene contains more than one filtered variant and each variant was inherited  
173 from mother and father separately (for proband), or at least one but not all of the  
174 filtered variants of a gene were found from the progeny (for parent), the variants were  
175 called as CH. RHo variants were called if filtered variants are inherited in a  
176 homozygous manner in autosomes and never seen in gnomAD as homozygous. RHe  
177 variants were called if filtered variants are in the X chromosome and never seen in  
178 gnomAD as hemizygous or homozygous. Functionality scores were extracted from  
179 dbNSFP [23].



180 **Results**

181

182 *Diagnostic success rate of WES analyses*

183 The symptoms experienced by KND patients were mostly of pediatric onset (mean 1.4  
184 years of age). Pediatric patients harbored neurodevelopmental problems and were  
185 soon referred to tertiary hospitals (mean 1.8 years of age). The majority of the patients  
186 visited multiple tertiary hospitals for diagnosis (88.8% visited more than one hospital,  
187 mean of 2.3 hospitals), required a mean of 2.3 specialists (31.6% required more than  
188 two) and spent a mean of 5.6 years elapsed before WES analysis at SNUCH (Table 1,  
189 Additional file: Figure S2). The distribution of straight-line distances from home to the  
190 clinic strongly correlates with the original population distribution of Korea,  
191 demonstrating that our cohort covers the entire population (Table 1, Additional file:  
192 Figure S3).

193 The majority of the patients is sporadic origin (504/553 = 91.1%; Fig. 1a),  
194 making them suitable for trio-based WES analysis. Major clinical feature of the KND  
195 cohort was neurodevelopmental disease (84.1%; Fig. 1b). Integrative assessments of  
196 genetic variants, their clinical impacts, and patient symptoms allowed us to diagnose  
197 40.3% (223/553) of the cohort with high confidence. The patients included carriers of  
198 CNVs (23/553 = 4.2%; 16 heterozygous deletions and 7 duplications; Additional file:  
199 Table S1), in which 20 CNVs originated *de novo* (3.6% of the entire cohort), which is  
200 slightly lower but comparable to a previous observation [24]. Three inherited  
201 pathogenic CNVs were identified: a 165.5 kb deletion in a large family containing  
202 multiple affected individuals (Additional file: Figure S4), and 7.2 Mb and 203.2 kb  
203 hemizygous duplications that were transmitted from healthy moms to their affected  
204 sons (Additional file: Table S1). An additional 7.1% of the cohort (39 patients) harbored  
205 previously reported variants that were assumed to be pathogenic but displayed distinct

206 phenotypes, potentially expanding the phenotypic spectrum associated with these  
207 genes. For example, two patients that carried a pathogenic heterozygous nonsense or  
208 missense variant in *COL1A1*, known to cause osteogenesis imperfecta [25], were  
209 initially diagnosed with muscle hypotonia. These two patients did not display skeletal  
210 problems, but showed blue sclera [26]. Adding this group to the high confidence group  
211 yielded an instant diagnostic rate of 47.4% (“known genes”; Additional file: Table S2).  
212 Finally, an additional 10.1% of the cohort (56 patients, 53 genes) harbored variants that  
213 are highly likely to be pathogenic but their disease associations are elusive (“novel  
214 genes”), yielding a “suggestive” diagnostic yield of 57.5% (Fig. 1c). Among the patients  
215 with definite diagnosis, 35.1% are recessive, and 29.9% harbored loss-of-function (LoF)  
216 variants (Fig. 1d and Additional file: Figure S5). As expected, the known genes showed  
217 strong enrichment in disease categories and gene ontologies such as intellectual  
218 disability and central nervous system (CNS) development (Fig. 1e).

219

#### 220 *Novel genes display potential enrichment in neuronal differentiation*

221 We assessed whether the 53 novel genes possess a neurologic disease-causing  
222 function. The novel gene set was simulated against the BrainSpan data (Materials and  
223 Methods) to evaluate if the expression of these novel genes as a group was strongly  
224 correlated with known disease-associated genes during brain development. After  $10^5$   
225 permutations, we found that the observed involvement of the novel genes was  
226 significantly stronger than a randomly selected gene sets across eight developmental  
227 windows (Fig. 1f, g;  $P_{adj} < 0.05$  for all periods). Furthermore, this test was expanded to  
228 the four anatomical domains in each period, yielding 32 spatio-temporal windows (Fig.  
229 1g). It is notable that the most highly enriched windows are concentrated in the frontal  
230 cortex area (Fig. 1g; R1 x P1-4). These results suggest that expression of the novel  
231 genes is concordant with known disease-causing genes in developing brains and this

232 phenomenon is most prominent in the frontal cortex.

233

234 *Profile of recessive variants that predispose neurodevelopmental disorders*

235 Using our set of defined pathogenic variants, we explored the genetic properties of  
236 these variants that caused disorders in a recessive manner. First, to test if recessive  
237 variants (CH, RHo and RHe) are more frequently found in patients as compared to  
238 healthy individuals, we counted the number of recessive variants in our cohort and  
239 compared these values between patients and healthy parents as controls. Counting all  
240 recessive variants from patients and controls, we observed that there is no substantial  
241 difference in the number of variants for CH, RHo and RHe (Fig. 2a). Extracting LoF  
242 variants, variants in OMIM-listed genes or variants in neurodevelopment-related genes  
243 did not reveal any difference in burden (Fig. 2a and Additional file: Figure S6), implying  
244 the presence of overwhelming non-pathogenic or non-functional recessive calls in the  
245 patients. The majority of genes that were found in our patients with definite diagnosis  
246 has been previously documented in OMIM, and has good concordance with previously  
247 known recessive or dominant inheritance patterns (Fig. 2b). There were two  
248 exceptional cases in which the genes are listed as recessive in OMIM but were  
249 dominantly inherited in our patients. First, only the recessive *ACOX1* phenotype has  
250 been recognized to date [27], but we are currently working on a report that describes  
251 this dominant *ACOX1* variant. Second, a previous report suggested that the *C19orf12*  
252 variant has dominant effect, similar to our observations. But this report is not yet listed  
253 in OMIM [28]. Next, to test if the genetic properties of recessive variants are different  
254 from those of dominant variants, several parameters were compared. Dominant  
255 variants (mean allele frequency =  $6.2 \times 10^{-7}$ ) were found less frequently in gnomAD  
256 than recessive variants (mean allele frequency =  $1.6 \times 10^{-5}$ ; Mann-Whitney U test  $P =$   
257  $1.7 \times 10^{-13}$ ), since most of the dominant variants originated *de novo* whereas recessive

258 variants were inherited from healthy parents (Fig. 2c). Recessive variants were slightly  
259 less conserved as compared to the dominant variants, based on PhyloP or amino acid  
260 conservation among vertebrate species (Mann-Whitney U test  $P = 0.034$  and  $0.048$ ,  
261 respectively; Fig. 2d). Other functionality test values did not differ significantly between  
262 the two groups (CADD  $P = 0.50$ , GERP  $P = 0.15$  and SIFT  $P = 0.17$ , Mann-Whitney U  
263 tests). On the contrary, the genes that contain the recessive variants displayed more  
264 lenient constraint as compared to the dominant genes or known haploinsufficiency  
265 genes, as documented by observed/expected ratio (o/e) and pLI score in gnomAD [20].  
266 But the recessive genes still display a similar or a slightly more constrained pattern  
267 compared to the genes in OMIM (Fig. 2e and Additional file: Figure S7). Functional  
268 characterization of recessive neurodevelopmental disease genes revealed an  
269 enrichment for genes involved in lipid metabolism and mitochondrial processes (Fig. 2f),  
270 in addition to the expected enrichment in CNS development. The relative position of  
271 LoF variants in recessive genes demonstrated a similar lenient pattern, more enriched  
272 in the C-terminal portion, as compared to the dominant genes (Fig. 2g). There was no  
273 significant difference in basic clinical parameters (displayed in Table 1) between the  
274 recessive and dominant patient groups (data not shown).

275

#### 276 *Profile of pathogenic recessive variants carried in healthy individuals*

277 Unlike *de novo* variants that originate largely at random, assembly of recessive  
278 variants can be pre-screened and avoided if such variants can be identified in parents.  
279 Taking advantage of the extensive coverage of the patient pool maintained by Korea's  
280 centralized medical system and our analysis results of patients with severe  
281 neurodevelopmental disorders, it is feasible to infer the probability of recessive variant  
282 assembly in Koreans. Several numbers and assumptions are required for this  
283 estimation: (i) approximately 400,000 babies are born every year in Korea as of 2016

284 [29], (ii) approximately 1,000 patients with severe neurodevelopmental disorders newly  
285 enroll in our neurodevelopmental disorder clinic every year, (iii) these patients  
286 encompass the majority of the Korean population, as exemplified by the sizes of our  
287 DMD and Rett cohorts [17, 18] and reflected in the geographical distribution of the KND  
288 patients (Table 1 and Additional file: Figure S3), (iv) our result from 553 patients  
289 revealed a recessive genetic origin in approximately one-third of the patients (Fig. 1d)  
290 and (v) Koreans typically marry an individual with minimal genetic similarity. These  
291 observations lead a 1/1,200 incidence rate for developing a severe  
292 neurodevelopmental disease in a recessive manner, which can be explained by the  
293 existence of one carrier for every 17 healthy individuals (1/1,156; Fig. 3a). One can  
294 point out limited evidence for one of our assumptions that we cover the majority of the  
295 Korean population. But applying a partial coverage in the estimation will result in  
296 increased incidence of neurodevelopment disorder patients and unintentionally inflate  
297 the carrier frequency. Therefore, the assumption ensures conservative estimation. Next,  
298 we sought to understand the properties of pathogenic recessive variants as compared  
299 to the variants found from gnomAD on the same set of 69 genes that contain these  
300 variants. As expected, KND recessive variants were found less frequently (Fig. 3b),  
301 were strongly conserved during evolution (Fig. 3c), and displayed stronger functionality  
302 scores (Fig. 3d) compared to all gnomAD variants found in the same set of genes.  
303 Among many variants of obscure functional significances, heterozygous LoF and  
304 ClinVar variants in gnomAD can be considered as a first-tier culprit for pathogenic  
305 recessive variants. And we observed that the portion that is attributable to LoF and  
306 ClinVar variants by healthy carriers was variable among the genes, and this portion is  
307 correlated with the o/e LoF value (Pearson's correlation  $r = 0.33$ ; Fig. 3e).  
308  
309

310 **Discussion**

311

312 This study demonstrates the clinical utility of applying WES to children with various and  
313 complex neurodevelopmental disorders. We identified genetic causes in 47.4% of the  
314 patients and evaluated the characteristics of the variants that caused the disorders in a  
315 recessive manner.

316 Consistent with previous studies, we were able to diagnose approximately half  
317 of the KND patients (Fig. 1c) [10–12, 14, 16]. The novel genes formed significantly  
318 robust co-expression networks during neurodevelopment processes, which was most  
319 prominent in frontal cortex regions (Fig. 1f, g). There was no significant difference in  
320 the number of recessive calls between patients and controls, even after stratifying the  
321 calls into disease-related gene sets (Fig. 2a and Additional file: Figure S6). This result  
322 suggests following: (i) although categorized as “neurodevelopmental”, our patient set is  
323 heterogeneous in nature, diluting contribution of single functional entity, (ii) patients  
324 carry more non-pathogenic or non-functional recessive calls than expected and we  
325 need more power to extract biologically relevant signals. The pathogenic recessive  
326 variants that cause rare neurodevelopmental disorders displayed moderately increased  
327 allele frequency values and marginally increased evolutionary conservation as  
328 compared to dominant variants, suggesting that the qualitative differences between  
329 these two groups of variants were not dramatically different (Fig. 2c, d). Compared to  
330 the relatively mild differences in variant characteristics, the genes that caused such  
331 disorders displayed more discernible differences based on several parameters. First,  
332 the recessive genes harbor increased o/e LoF values, implying that there is no  
333 constraint applied to the recessive genes, whereas dominant genes in displayed a  
334 highly biased pattern toward known haploinsufficiency genes (Fig. 2e). Similarly, the  
335 distribution of the relative locations of LoF variants in genes suggested that recessive

336 genes were less constrained compared to dominant genes (Fig. 2g). GO analysis  
337 further support that – while the two groups are predominantly composed of  
338 neurodevelopment-related genes – recessive genes contain an enriched number of  
339 genes that are involved in lipid metabolism and mitochondria function (Fig. 2f). This is a  
340 plausible result considering that these pathways are essential for normal brain  
341 development [30, 31]. To summarize, these observations suggest that gene properties  
342 are stronger determinants of whether the disease adopts a recessive or dominant  
343 inheritance pattern than variant properties.

344         Predicting and avoiding the occurrence of recessive disorders is critical.  
345 Carrier estimation has been traditionally performed mostly for single-gene diseases  
346 such as  $\beta$ -thalassaemia, Tay-Sachs disease and cystic fibrosis, and efficiently reduced  
347 the incidence of these patients [32–34]. However, even after introducing aggressive  
348 analysis of genetic disorders using whole exome or whole genome sequencing, precise  
349 estimation of the incidence and contribution of rare Mendelian disorders in a recessive  
350 manner remains variable for study populations and disorders [2]. For example, analysis  
351 of the Deciphering Developmental Disorders (DDD) data suggested only 3.6% of  
352 recessive disorders were attributable to patients of European ancestry whereas this  
353 value was 30.9% for patients of Pakistani ancestry [4]. Systematic analysis of  
354 schizophrenia data did not detect a substantial contribution of recessive variants [5, 6].  
355 These observations differ from ours, where 35.1% of the definitely diagnosed patients  
356 emerged in a recessive mode (Fig. 1d), which is in good agreement with previous  
357 diagnostic WES studies [10, 35, 36].

358         Due to a diminishing birth rate and presumably with a burden of having a  
359 severely sick child, the majority of our patients lack affected sibling. Therefore, only  
360 11.1% of the patients of recessive origins were from the class 2 pedigree (two siblings  
361 being affected, Fig. 1a). Remaining 88.9% of the patients were from the class 3

362 pedigree and not readily discernable whether their disorders follow dominant or  
363 recessive inheritance until WES analysis revealed genetic etiology.

364         Since the majority of these pathogenic recessive variants were inherited from  
365 healthy parents, and ethnic Koreans comprise a relatively isolated population with a  
366 centralized medical system, it was feasible to derive an estimate that one out of 17  
367 individuals are healthy carriers of pathogenic recessive variants for severe  
368 neurodevelopmental disorders (Fig. 3a). Accumulating this estimated carrier portion  
369 across different rare severe disease entities will certainly increase this ratio. The  
370 contribution of known LoF and ClinVar variants varies by genes and is positively  
371 correlated with o/e LoF values (Fig. 3e), and pathogenic recessive variants display  
372 systematic differences that differentiate them from gnomAD variants (Fig. 3b-d). Thus,  
373 it would be feasible to predict potential rare recessive variants from genomic data of  
374 healthy parents with the help of large patient and control genomic data in the near  
375 future.

376         Our approach expanded the phenotypic spectrum of known genes (39 cases,  
377 7.1%), and suggested novel genes that may allow us to better understand  
378 neurodevelopmental disease mechanisms (56 patients, 10.1%). Nevertheless, 42.5%  
379 of the cases (235/533) remained undiagnosed even after our WES effort, suggesting a  
380 substantial opportunity for further improvement (Fig. 1c). Related to this, a systematic  
381 re-analysis effort with additional bioinformatics pipelines increased the diagnostic rate  
382 by 4.2% [37]. Also, searching for functional non-coding variants through whole genome  
383 sequencing (WGS) and evaluating multiple rare functional variants that may increase  
384 disease predisposition may be beneficial [38], although a recent meta-analysis study  
385 claimed only a minimal improvement in the WGS diagnostic rate, presumably due to  
386 our limited understanding of the function of noncoding variant [39]. An alternative  
387 approach would be to integrate genome data with transcriptome data in order to



388 identify functionally cryptic variants that directly influence expression of critical genes  
389 [40, 41], although preparing patient-derived tissue still remains as a practical challenge.

390 Our study also addresses the clinical challenges of an evolving phenotype over  
391 time in growing children and how this can be overcome, which facilitates identification  
392 of treatable or actionable cases (Table 2; Additional file: Notable vignettes and Figure  
393 S8). Our patient cohort included a successful drug repositioning case for a rare  
394 neurogenetic disease [42] (Table 2). All of these cases are expected to increase as  
395 more genotype-phenotype relationships are discovered and more drugs become  
396 available. This study demonstrates that applying WES and subsequent in-depth  
397 analysis provides clinical and practical benefits to existing patients and their families  
398 and reducing emergence of such patients.

399

400

## 401 **Conclusions**

402 We analyzed a comprehensive cohort of rare severe neurodevelopmental disorders in  
403 Korea. We genetically diagnosed approximately half of the cohort and discovered novel  
404 genetic associations in ~10% of the cohort. Precise etiology for ~40% of the cohort still  
405 remains to be elucidated. Extensive analysis of the genetic characteristics of variants  
406 and genes that predispose patients to recessive disorders as compared to those of  
407 dominant disorders was performed. For this specific set of rare diseases, the properties  
408 of genes were a stronger determinant of inheritance pattern as compared to those of  
409 variants. Based on these observations, we deduced a ratio of 1/17 for finding a  
410 pathogenic recessive variant carrier and suggest several features that predispose  
411 variants to reach a pathogenic level. More extensive genome-wide analysis of rare  
412 disease patients and healthy controls in a systematic way would provide further  
413 insights into the behavior of rare inherited variants that may function as pathogenic  
414 recessive variants.

415 Our study presented a genetic analysis of 553 Korean pediatric patients with  
416 unexplained neurodevelopmental problems that revealed various known and novel  
417 genetic etiologies. We provided rationales for aggressively extending our system to a  
418 wider range of undiagnosed rare disease patients in countries with centralized  
419 healthcare like Korea. Through a careful integration of detailed phenotyping, genetic  
420 analysis and data sharing, we demonstrate how this approach can facilitate more  
421 precise diagnoses and personalized patient care, including pre-screening of rare  
422 recessive diseases. Finally, we demonstrated the successful establishment of this  
423 approach in Korea, and the necessity of this approach for patients with various  
424 undiagnosed neurodevelopmental disorders in countries of similar status.

425 **Abbreviations**

426 CADD: Combined Annotation Dependent Depletion; CH: Compound heterozygous;  
427 CNV: Copy number variation; DDD: Deciphering Developmental Disorders; GERP:  
428 Genomic Evolutionary Rate Profiling; gnomAD: Genome Aggregation Database; GO:  
429 Gene Ontology; KND: Korean neurodevelopmental disorder; LoF: Loss-of-function;  
430 OMIM: Online Mendelian Inheritance in Man; phyloP: phylogenetic P-values; RHe:  
431 Rare hemizygous; RHo: Rare homozygous; SIFT: Sorting Intolerant From Tolerant;  
432 WES: Whole exome sequencing; WGS: Whole genome sequencing

433

434 **Acknowledgements**

435 The authors gratefully acknowledge patients and parents participated in this study.

436

437 **Funding**

438 This study was funded by grants from the Ministry of Health and Welfare (HI16C1986),

439 the Korea Centers for Disease Control and Prevention (20170607DBF-00) and the

440 Korean National Research Foundation (2018M3C9A5064708).

441

442 **Availability of data and materials**

443 Anonymized data not published within this article will be made available by request

444 from any qualified investigator for purposes of replicating procedures and results.

445

446 **Authors' contributions**

447 MC and JHC are responsible for study concept and design, supervised the study and

448 obtained funding. YL, SP, JC, YY, SL, TY, ML, JS, Jeongeun Lee, JK, EYJ, EK, and MC

449 analyzed genome data. JSL, SYK, JC, HK, WJK, JSK, JMK, AC, BCL, WSK, and JHC

450 provided clinical data. YL, SP, JSL, SYK, JC, MC, and JHC combined genetic and

451 clinical data. YL, SP, JC, Jeongeun Lee, JK, Jean Lee, HJ, EYJ, SEH, and MC

452 performed genetic and statistical evaluation of the cohort. YL, SP, JSL, SYK, MC, and

453 JHC drafted the manuscript. All authors reviewed the manuscript for important

454 intellectual content.

455

456 **Ethics approval and consent to participate**

457 This study was approved by the Seoul National University Hospital Institutional Review

458 Board (No. 1406-081-588).

459

460 **Consent for publication**

461 Not applicable

462

463 **Competing interests**

464 The authors declare no conflict of Interest.

465

466 **Reference**

- 467 1. Boycott KM, Vanstone MR, Bulman DE, MacKenzie AE. Rare-disease genetics in  
468 the era of next-generation sequencing: Discovery to translation. *Nature Reviews*  
469 *Genetics*. 2013;14:681–91. doi:10.1038/nrg3555.
- 470 2. Antonarakis SE. Carrier screening for recessive disorders. *Nat Rev Genet*. 2019.  
471 doi:10.1038/s41576-019-0134-2.
- 472 3. Jin SC, Homsy J, Zaidi S, Lu Q, Morton S, Depalma SR, et al. Contribution of rare  
473 inherited and de novo variants in 2,871 congenital heart disease probands. *Nat Genet*.  
474 2017;49:1593–601. doi:10.1038/ng.3970.
- 475 4. Martin HC, Jones WD, McIntyre R, Sanchez-Andrade G, Sanderson M, Stephenson  
476 JD, et al. Quantifying the contribution of recessive coding variation to developmental  
477 disorders. *Science (80- )*. 2018;362:1161–4.
- 478 5. Rees E, Kirov G, Walters JT, Richards AL, Howrigan D, Kavanagh DH, et al.  
479 Analysis of exome sequence in 604 trios for recessive genotypes in schizophrenia.  
480 *Transl Psychiatry*. 2015;5 June:e607.
- 481 6. Ruderfer DM, Lim ET, Genovese G, Moran JL, Hultman CM, Sullivan PF, et al. No  
482 evidence for rare recessive and compound heterozygous disruptive variants in  
483 schizophrenia. *Eur J Hum Genet*. 2015;23:555–7. doi:10.1038/ejhg.2014.228.
- 484 7. Monies D, Abouelhoda M, Assoum M, Moghrabi N, Rafiullah R, Almontashiri N, et al.  
485 Lessons Learned from Large-Scale, First-Tier Clinical Exome Sequencing in a Highly  
486 Consanguineous Population. *Am J Hum Genet*. 2019;:1–20.  
487 doi:10.1016/j.ajhg.2019.04.011.
- 488 8. Alkuraya FS. Discovery of mutations for Mendelian disorders. *Hum Genet*.  
489 2016;135:615–23.
- 490 9. Lifton RP, Gharavi AG, Geller DS, Hughes H. Molecular Mechanisms Review of  
491 Human Hypertension. 2001;104:545–56.
- 492 10. Srivastava S, Cohen JS, Vernon H, Barañano K, McClellan R, Jamal L, et al.  
493 Clinical whole exome sequencing in child neurology practice. *Ann Neurol*.  
494 2014;76:473–83.
- 495 11. Trujillano D, Bertoli-Avella AM, Kumar Kandaswamy K, Weiss ME, Köster J, Marais  
496 A, et al. Clinical exome sequencing: results from 2819 samples reflecting 1000 families.  
497 *Eur J Hum Genet*. 2016;25 September:176–82. doi:10.1038/ejhg.2016.146.
- 498 12. Yang Y, Muzny DM, Xia F, Niu Z, Person R, Ding Y, et al. Molecular Findings  
499 Among Patients Referred for Clinical Whole-Exome Sequencing. *Jama*. 2014;312:1870.

- 500 doi:10.1001/jama.2014.14601.
- 501 13. Baynam G, Pachter N, McKenzie F, Townshend S, Slee J, Kiraly-Borri C, et al. The  
502 rare and undiagnosed diseases diagnostic service - application of massively parallel  
503 sequencing in a state-wide clinical service. *Orphanet J Rare Dis.* 2016;11:77.  
504 doi:10.1186/s13023-016-0462-7.
- 505 14. Beaulieu CL, Majewski J, Schwartzenruber J, Samuels ME, Fernandez BA,  
506 Bernier FP, et al. FORGE Canada consortium: Outcomes of a 2-year national rare-  
507 disease gene-discovery project. *Am J Hum Genet.* 2014;94:809–17.
- 508 15. Gahl WA, Mulvihill JJ, Toro C, Markello TC, Wise AL, Ramoni RB, et al. The NIH  
509 Undiagnosed Diseases Program and Network: Applications to modern medicine. *Mol*  
510 *Genet Metab.* 2016;117:393–400. doi:10.1016/j.ymgme.2016.01.007.
- 511 16. McRae JF, Clayton S, Fitzgerald TW, Kaplanis J, Prigmore E, Rajan D, et al.  
512 Prevalence and architecture of de novo mutations in developmental disorders. *Nature.*  
513 2017;542:433–8. doi:10.1038/nature21062.
- 514 17. Cho A, Seong MW, Lim BC, Lee HJ, Byeon JH, Kim SS, et al. Consecutive  
515 analysis of mutation spectrum in the dystrophin gene of 507 Korean boys with  
516 Duchenne/Becker muscular dystrophy in a single center. *Muscle and Nerve.*  
517 2017;55:727–34.
- 518 18. Yoo Y, Jung J, Lee Y-N, Lee Y, Cho H, Na E, et al. GABBR2 mutations determine  
519 phenotype in rett syndrome and epileptic encephalopathy. *Ann Neurol.* 2017;82:466–  
520 78. doi:10.1002/ana.25032.
- 521 19. Deuchler M. *The Confucian Transformation of Korea: A Study of Society and*  
522 *Ideology.* 1st edition. Harvard University Asia Center, Harvard University; 1992.  
523 doi:DOI: 10.2307/j.ctt1dnn8zj.
- 524 20. Karczewski KJ, Francioli LC, Tiao G, Cummings BB, Alföldi J, Wang Q, et al.  
525 Variation across 141,456 human exomes and genomes reveals the spectrum of loss-  
526 of-function intolerance across human protein-coding genes. *bioRxiv.* 2019;:531210.  
527 doi:10.1101/531210.
- 528 21. Lee S, Seo J, Park J, Nam JY, Choi A, Ignatius JS, et al. Korean Variant Archive  
529 (KOVA): A reference database of genetic variations in the Korean population. *Sci Rep.*  
530 2017;7:1–9.
- 531 22. Kang HJ, Kawasawa YI, Cheng F, Zhu Y, Xu X, Li M, et al. Spatio-temporal  
532 transcriptome of the human brain. *Nature.* 2011;478:483–9. doi:10.1038/nature10523.
- 533 23. Liu X, Jian X, Boerwinkle E. dbNSFP: A lightweight database of human

- 534 nonsynonymous SNPs and their functional predictions. *Hum Mutat.* 2011;32:894–9.
- 535 24. Sanders SJ, Ercan-Sencicek AG, Hus V, Luo R, Murtha MT, Moreno-De-Luca D, et  
536 al. Multiple Recurrent De Novo CNVs, Including Duplications of the 7q11.23 Williams  
537 Syndrome Region, Are Strongly Associated with Autism. *Neuron.* 2011;70:863–85.
- 538 25. Cohn DH, Byers PH, Steinmann B, Gelinias11 RE. Lethal osteogenesis imperfecta  
539 resulting from a single nucleotide change in one human proal(I) collagen allele  
540 (mutation/gene cloning/DNA sequence analysis/extracellular matrix). *Genetics.*  
541 1986;83 August:6045–7.
- 542 26. Lee JS, Seo J, Cho A, Lim BC, Choi M, Kim JW, et al. Severe hypotonia and  
543 postnatal growth impairment in a girl with a missense mutation in COL1A1: Implication  
544 of expanded phenotypic spectrum of type I collagenopathy. *Brain Dev.* 2017;39:799–  
545 803. doi:10.1016/j.braindev.2017.04.020.
- 546 27. Ferdinandusse S, Denis S, Hogenhout EM, Koster J, Van Roermund CWT, Ijlst L,  
547 et al. Clinical, biochemical, and mutational spectrum of peroxisomal acyl-coenzymie A  
548 oxidase deficiency. *Hum Mutat.* 2007;28:904–12.
- 549 28. Gregory A, Lotia M, Jeong SY, Fox R, Zhen D, Sanford L, et al. Autosomal  
550 dominant mitochondrial membrane protein-associated neurodegeneration (MPAN).  
551 *Mol Genet Genomic Med.* 2019; March:e736. doi:10.1002/mgg3.736.
- 552 29. Statistics Korea. Final Results of Birth Statistics in 2016. 2016.  
553 <http://kostat.go.kr/portal/eng/pressReleases/8/1/index.board?bmode=read&bSeq=&aSeq=363582&pageNo=1&rowNum=10&navCount=10&currPg=&searchInfo=srch&sTarget=title&sTxt=birth>.
- 554  
555
- 556 30. McKenna MC, Schuck PF, Ferreira GC. Fundamentals of CNS energy metabolism  
557 and alterations in lysosomal storage diseases. *J Neurochem.* 2019;148:590–9.
- 558 31. Tracey TJ, Steyn FJ, Wolvetang EJ, Ngo ST. Neuronal Lipid Metabolism: Multiple  
559 Pathways Driving Functional Outcomes in Health and Disease. *Front Mol Neurosci.*  
560 2018;11 January:1–25.
- 561 32. Cao A, Kan YW. The prevention of thalassemia. *Cold Spring Harb Perspect Med.*  
562 2013;3:1–15.
- 563 33. Kaback M, Lim-Steele J, Dabholkar D, Brown D, Levy N, Zeiger K. Tay-sachs  
564 disease—carrier screening, prenatal diagnosis and the molecular era: An international  
565 perspective, 1970 to 1993. *Obstet Gynecol Surv.* 1994;49:321–2.
- 566 34. Watson MS, Cutting GR, Desnick RJ, Driscoll DA, Klinger K, Mennuti M, et al.  
567 Cystic fibrosis population carrier screening: 2004 revision of American College of



- 568 Medical Genetics mutation panel. *Genet Med.* 2004;6:387–91.  
569 doi:10.109701.GIM.0000139506.11694.7C.
- 570 35. Evers C, Staufner C, Granzow M, Paramasivam N, Hinderhofer K, Kaufmann L, et  
571 al. Impact of clinical exomes in neurodevelopmental and neurometabolic disorders. *Mol*  
572 *Genet Metab.* 2017;121:297–307.
- 573 36. Kuperberg M, Lev D, Blumkin L, Zerem A, Ginsberg M, Linder I, et al. Utility of  
574 Whole Exome Sequencing for Genetic Diagnosis of Previously Undiagnosed Pediatric  
575 Neurology Patients. *J Child Neurol.* 2016;31:1534–9.
- 576 37. Bergant G, Maver A, Lovrecic L, Čuturilo G, Hodzic A, Peterlin B. Comprehensive  
577 use of extended exome analysis improves diagnostic yield in rare disease: A  
578 retrospective survey in 1,059 cases. *Genet Med.* 2018;20:303–12.
- 579 38. Werling DM, Brand H, An J-Y, Stone MR, Zhu L, Glessner JT, et al. An analytical  
580 framework for whole-genome sequence association studies and its implications for  
581 autism spectrum disorder. *Nat Genet.* 2018;50:727–36. doi:10.1038/s41588-018-0107-  
582 y.
- 583 39. Clark MM, Stark Z, Farnaes L, Tan TY, White SM, Dimmock D, et al. Meta-analysis  
584 of the diagnostic and clinical utility of genome and exome sequencing and  
585 chromosomal microarray in children with suspected genetic diseases. *npj Genomic*  
586 *Med.* 2018;3:1–10. doi:10.1038/s41525-018-0053-8.
- 587 40. Cummings BB, Marshall JL, Tukiainen T, Lek M, Donkervoort S, Foley AR, et al.  
588 Improving genetic diagnosis in Mendelian disease with transcriptome sequencing. *Sci*  
589 *Transl Med.* 2017.
- 590 41. Gonorazky HD, Naumenko S, Ramani AK, Nelakuditi V, Mashouri P, Wang P, et al.  
591 Expanding the Boundaries of RNA Sequencing as a Diagnostic Tool for Rare  
592 Mendelian Disease. *Am J Hum Genet.* 2019;104:466–83.  
593 doi:10.1016/j.ajhg.2019.01.012.
- 594 42. Seo J, Kang JA, Suh DI, Park EB, Lee CR, Choi SA, et al. Tofacitinib relieves  
595 symptoms of stimulator of interferon genes (STING)???associated vasculopathy with  
596 onset in infancy caused by 2 de novo variants in TMEM173. *J Allergy Clin Immunol.*  
597 2017;139:1396-1399.e12.
- 598 43. Rehm HL, Ph D, Berg JS, Ph D, Brooks LD, Ph D, et al. Spe ci a l R e p o r t  
599 ClinGen — The Clinical Genome Resource. 2015;:1–8.
- 600 44. Boccuto L, Aoki K, Flanagan-Steet H, Chen CF, Fan X, Bartel F, et al. A mutation  
601 in a ganglioside biosynthetic enzyme, ST3GAL5, results in salt & pepper syndrome, a

602 neurocutaneous disorder with altered glycolipid and glycoprotein glycosylation. Hum  
603 Mol Genet. 2014;23:418–33.

604 45. Lee JS, Yoo Y, Lim BC, Kim KJ, Song J, Choi M, et al. GM3 synthase deficiency  
605 due to ST3GAL5 variants in two Korean female siblings: Masquerading as Rett  
606 syndrome-like phenotype. Am J Med Genet Part A. 2016;170:2200–5.

607 46. Strickland A V., Schabhüttl M, Offenbacher H, Synofzik M, Hauser NS, Brunner-  
608 Krainz M, et al. Mutation screen reveals novel variants and expands the phenotypes  
609 associated with DYNC1H1. J Neurol. 2015;262:2124–34.

610 47. Kim SY, Choi SA, Lee S, Lee JS, Hong CR, Lim BC, et al. Atypical presentation of  
611 infantile-onset farber disease with novel ASAH1 mutations. Am J Med Genet Part A.  
612 2016;170:3023–7.

613 48. Yoo D, Kim HJ, Lee JS, Lee S, Kim SY, Choi M, et al. Early-onset generalized  
614 dystonia starting in the lower extremities in a patient with a novel ANO3 variant.  
615 Parkinsonism and Related Disorders. 2018.

616 49. Hully M, Vuillaumier-Barrot S, Le Bizec C, Boddaert N, Kaminska A, Lascelles K, et  
617 al. From splitting GLUT1 deficiency syndromes to overlapping phenotypes. Eur J Med  
618 Genet. 2015;58:443–54.

619 50. Alfadhel M, Tabarki B. SLC19A3 Gene Defects Sorting the Phenotype and  
620 Acronyms: Review. Neuropediatrics. 2018.

621 51. Lamers IJC, Reijnders MRF, Venselaar H, Kraus A, Jansen S, de Vries BBA, et al.  
622 Recurrent De Novo Mutations Disturbing the GTP/GDP Binding Pocket of RAB11B  
623 Cause Intellectual Disability and a Distinctive Brain Phenotype. Am J Hum Genet.  
624 2017;101:824–32.

625

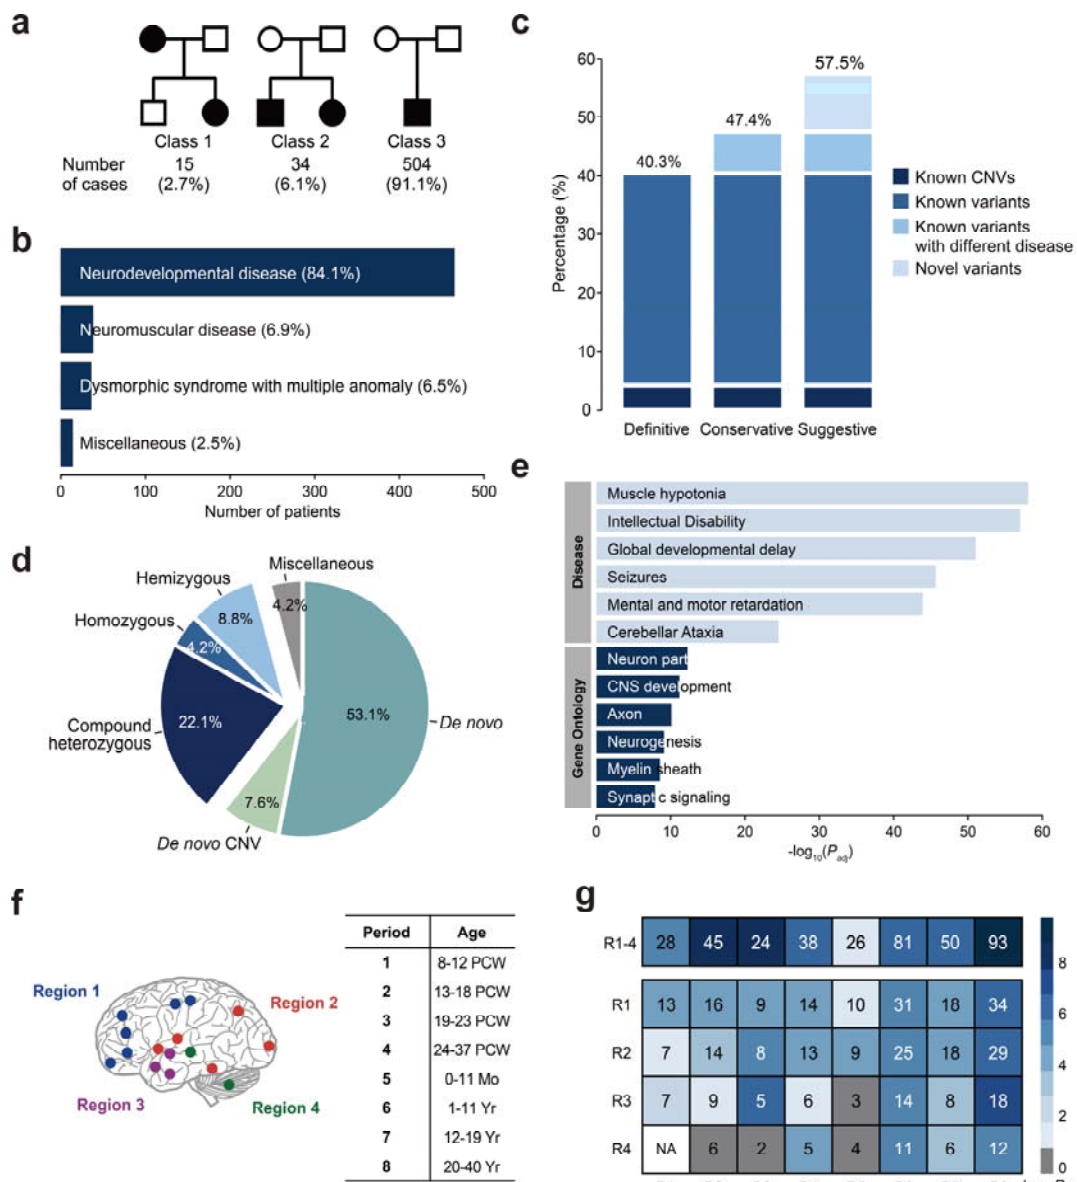

626

627 **Fig. 1. Classification of the KND cohort and results of clinical WES analysis.** (a)

628 Subjects by disease inheritance patterns. Class 1: autosomal dominant families; Class

629 2: families with affected siblings; Class 3: affected individuals with no family history. (b)

630 Major clinical features of the KND cohort. (c) Diagnostic yields of 553 patients with

631 undiagnosed symptoms using WES. (d) Pathogenic variants divided by inheritance

632 patterns. (e) GO and disease enrichment analysis of 164 known genes. (f) Brain

633 anatomical and developmental categorization used for our analysis. Components of

634 each brain region is shown in Additional file: Figure S9. (g) Strength of the co-  
635 expression network composed of our known/novel genes compared to random  
636 networks as measured by  $10^5$  permutations.

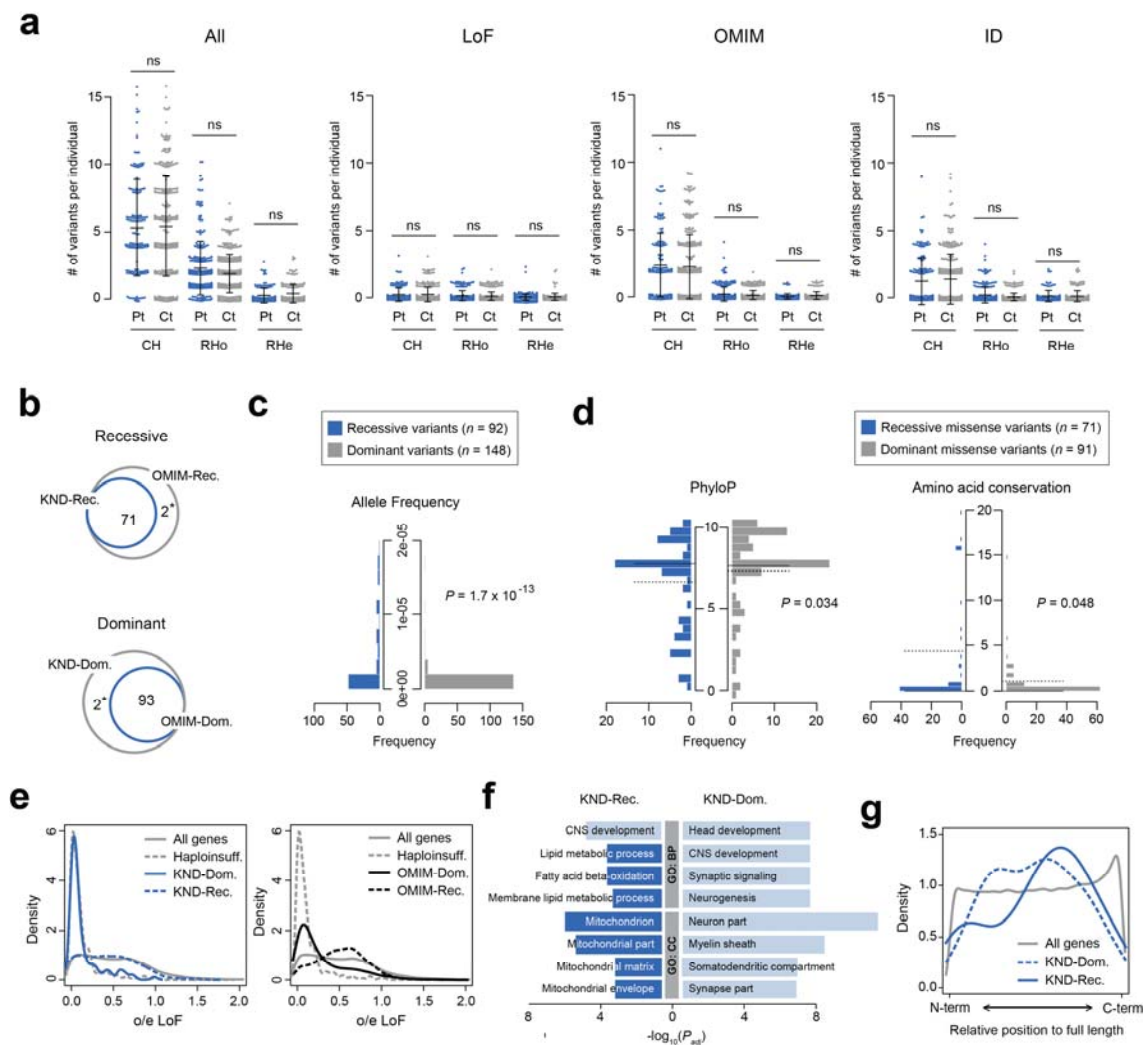

638 **Fig. 2. Genetic properties of pathogenic recessive variants.** (a) Burden of recessive variants in KND patients (Pt) and their parents  
639 as controls (Ct). Recessive variants are divided into compound heterozygous (CH), rare homozygous (RHo) and rare hemizygous  
640 (RHe) groups. Numbers found from all variants from all genes (“All”), LoF variants from all genes (“LoF”), all variants from OMIM-listed  
641 genes (“OMIM”) and all variants from intellectual disability gene set (“ID”, from DisGeNET) are plotted. Numbers of samples used for  
642 each category are as following: patients for CH = 145; controls for CH = 290; patients for RHo = 247; controls for RHo = 341; patients  
643 for RHe = 134; controls for RHe = 168. Data are mean  $\pm$  standard deviation. (b) Venn diagrams displaying high correlations of  
644 recessive or dominant inheritance patterns with their known inheritance patterns. The asterisks denote two exceptional cases, *ACOX1*  
645 and *C19orf12* (see text). (c) Allele frequency distribution of dominant and recessive variants. (d) PhyloP and amino acid conservation  
646 differences between dominant and recessive missense variants. Amino acid conservation is determined by the number of vertebrate  
647 species that contain an amino acid that is different from its human orthologous residue. The solid lines denote medians and the dotted  
648 lines denote means. (e) Distributions of o/e LoF values for dominant and recessive genes found from KND patients (left) and dominant  
649 and recessive genes from OMIM (right) plotted against all genes and known haploinsufficiency genes ( $n = 291$ ) [43]. (f) Functional  
650 differences between dominant and recessive genes by GO analysis. Ontologies in dark blue suggest non-neuronal signals specific to  
651 the recessive gene group. (g) Relative position of LoF variants in genes. Positions of pathogenic LoF variants in genes from KND  
652 patients are plotted against those LoF variant positions from all genes in gnomAD.

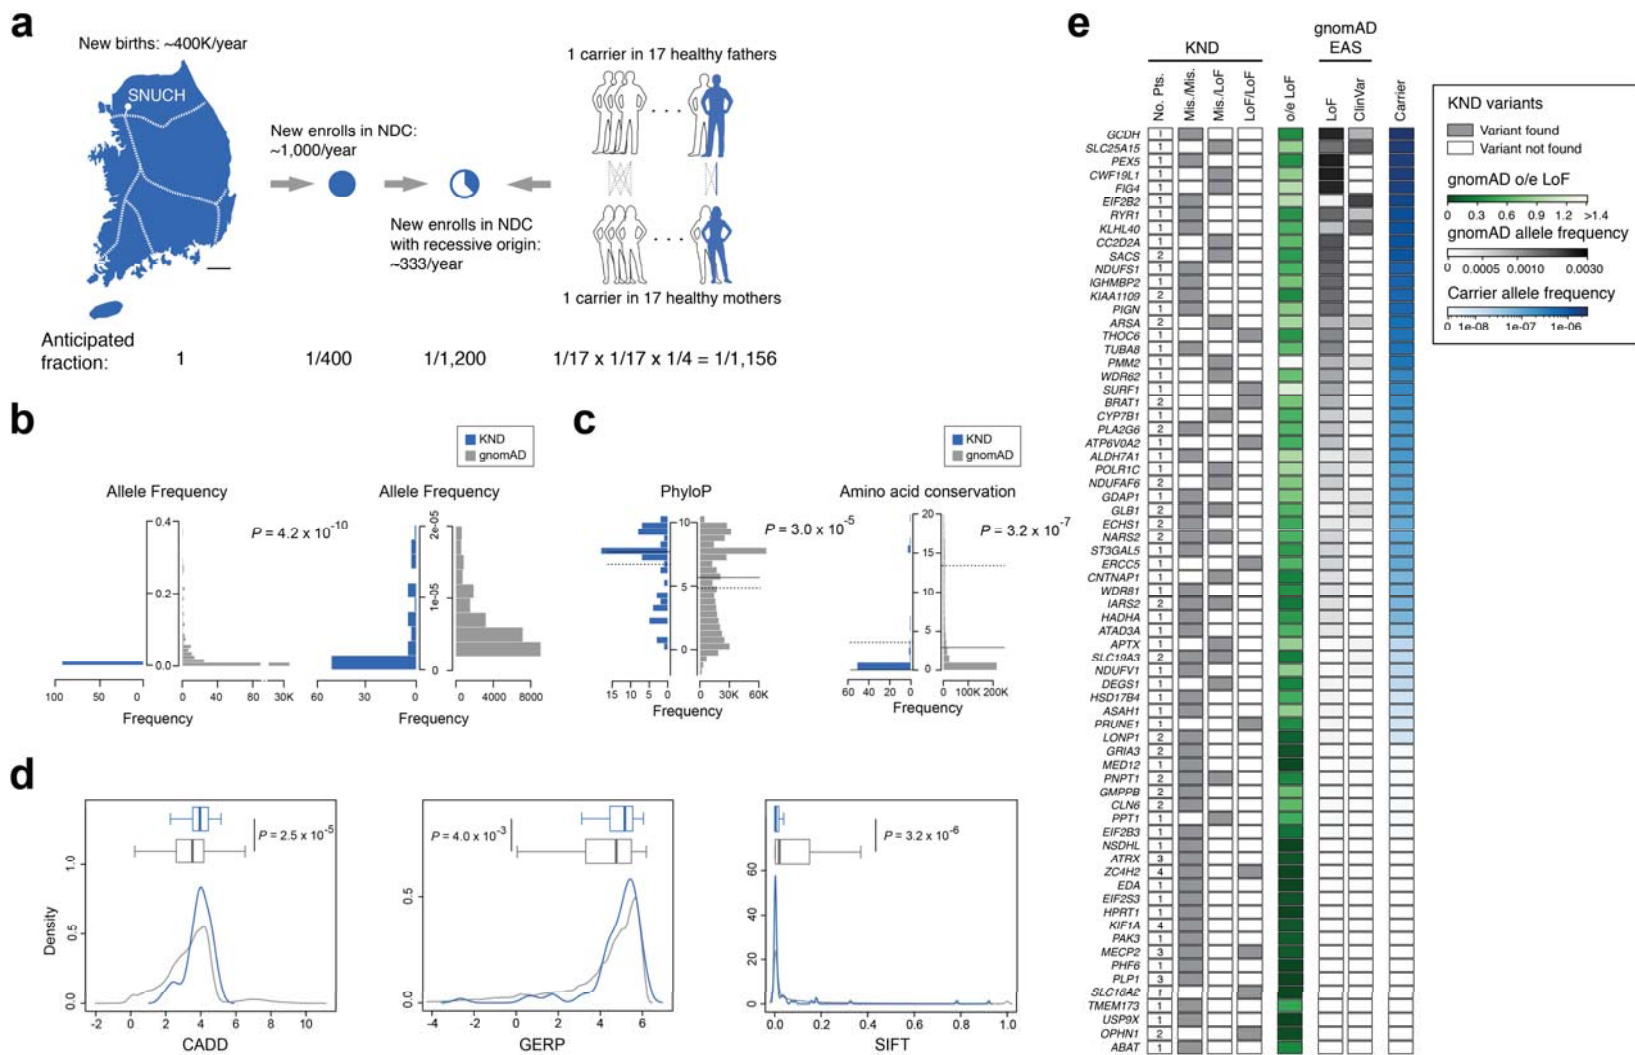

653

654 **Fig. 3. Screen for rare severe neurodevelopmental disorder carriers.** (a) A schematic diagram describing processes used to  
655 estimate neurodevelopmental disorder carrier frequency in the Korean population. The dotted lines in the map denote the Korea Train  
656 Express network, the high-speed railway system of Korea. (b-d) Distribution differences of various parameters between pathogenic  
657 recessive variants from KND patients and gnomAD variants from the same genes that were found in KND patients. (b) Allele frequency.  
658 The rare frequency portion of the left panel is separately plotted in the right panel. (c) PhyloP and amino acid conservation. The solid  
659 lines denote medians and the dotted lines denote means. (d) CADD, GERP and SIFT. (e) Recessive variants found from KND patients,  
660 o/e LoF values, and accumulated frequencies of LoF and ClinVar variants from gnomAD East Asians (EAS) for genes that harbor  
661 known pathogenic recessive variants in KND patients. Finally, portion that were attributable to ClinVar or LoF variants for pre-screening  
662 parents for each recessive gene are shown.  
663



664 **Table 1. Clinical information of 553 patients**

|                                                                    |               |
|--------------------------------------------------------------------|---------------|
| Sex ( <i>n</i> (%))                                                |               |
| Male                                                               | 265 (47.9)    |
| Female                                                             | 288 (52.1)    |
| Age at symptom onset (years)                                       | 1.4 (0-21)    |
| Age at first access to a tertiary hospital (years)                 | 1.8 (0-22)    |
| Interval between symptom onset and first medical access (months)   | 3.9 (0-238)   |
| Number of visited tertiary hospitals for diagnosis ( <i>n</i> (%)) |               |
| 1                                                                  | 62 (11.2)     |
| 2                                                                  | 277 (50.1)    |
| 3                                                                  | 178 (32.2)    |
| 4                                                                  | 32 (5.8)      |
| 5                                                                  | 4 (0.7)       |
| Age at WES (years)                                                 | 7.4 (0-37)    |
| Interval between the first access and WES (months)                 |               |
| Patients aged 0-10 years                                           | 34.0 (0-100)  |
| Patients aged >10 years                                            | 114.5 (7-434) |
| Primary clinical diagnosis ( <i>n</i> (%))                         |               |
| Rett syndrome-like encephalopathy                                  | 72 (13.0)     |
| Mitochondrial encephalopathy                                       | 49 (8.9)      |
| Epileptic encephalopathy                                           | 51 (9.2)      |
| Neuromuscular disorder                                             | 37 (6.7)      |
| Leukodystrophy                                                     | 27 (4.9)      |
| Hereditary spastic paraplegia                                      | 34 (6.1)      |
| Others                                                             | 283 (51.2)    |
| Number of involved specialists for diagnosis ( <i>n</i> (%))       |               |
| 1-2                                                                | 378 (68.4)    |
| 3-5                                                                | 152 (27.5)    |
| > 5                                                                | 23 (4.2)      |
| Straight-line distance from home to the clinic, km ( <i>n</i> (%)) |               |
| < 20                                                               | 186 (33.6)    |
| 20-100                                                             | 180 (32.5)    |

665 > 100 187 (33.8)

---

666  
667

**Table 2. Notable cases where WES-based analysis conferred correct diagnoses or changed medical treatment strategies**

| Initial clinical problem                                                             | Causal gene    | Modified clinical interpretation (MIM number)                        | Significance of WES-based patient evaluation (treatment)                                                                                                          | References |
|--------------------------------------------------------------------------------------|----------------|----------------------------------------------------------------------|-------------------------------------------------------------------------------------------------------------------------------------------------------------------|------------|
| Developmental regression with Rett syndrome-like phenotype                           | <i>ST3GAL5</i> | Salt and pepper developmental regression syndrome (#609056)          | Identified the molecular defect and established an accurate diagnosis                                                                                             | [44, 45]   |
| Hypotonia and motor delay followed by lower extremity weakness                       | <i>DYNC1H1</i> | Spinal muscular atrophy, lower extremity-predominant 1, AD (#158600) | Diagnosed a case with pleiotropic and evolving symptoms                                                                                                           | [46]       |
| Early onset hypotonia, sacral mass, congenital heart disease, and facial dysmorphism | <i>ASAH1</i>   | Farber lipogranulomatosis (#228000)                                  | Corrected a misdiagnosis                                                                                                                                          | [47]       |
| Ataxia followed by generalized dystonia                                              | <i>ANO3</i>    | Expanded spectrum of dystonia 24 (#615034)                           | Suggested a treatment strategy that resulted in gradual improvement within one year (deep brain stimulation)                                                      | [48]       |
| Focal lower leg dystonia, dystonic gait                                              | <i>SLC2A1</i>  | GLUT1 deficiency syndrome 2 (#612126)                                | Identified disease-specific treatment that resulted in near-elimination of dystonia (ketogenic diet)                                                              | [49]       |
| Leigh syndrome                                                                       | <i>SLC19A3</i> | Thiamine metabolism dysfunction syndrome 2 (#606152)                 | Identified disease-specific treatment that resulted in clinical improvements in dystonia, spasticity, and cognitive function (supplements of thiamine and biotin) | [50]       |
| Recurrent infections,                                                                | <i>TMEM173</i> | STING-associated vasculopathy,                                       | Provided a rationale for a new                                                                                                                                    | [42]       |

|                                                                          |               |                                                                                                            |                                                                           |      |
|--------------------------------------------------------------------------|---------------|------------------------------------------------------------------------------------------------------------|---------------------------------------------------------------------------|------|
| telangiectatic skin mottling, and brain infarctions                      |               | infantile-onset (#615934)                                                                                  | treatment strategy that improved the skin lesions (tofacitinib treatment) |      |
| Severe global developmental delay, seizures, and acanthotic skin lesions | <i>RAB11B</i> | Neurodevelopmental disorder with ataxic gait, absent speech, and decreased cortical white matter (#617807) | Identified a new disease gene leading to a neurodevelopmental syndrome    | [51] |

668
